# Supplementary material for: Rigid fused π-spacers in D–π–A type molecules for dye-sensitized solar cells: a computational investigation
Source: Royal Society of Chemistry journal article supplement (doi:10.1039/c7tc03112b), 2017-01-01
Supplement: c7tc03112b1.pdf [file c7tc03112b1.pdf]

# Supporting Information

## **Rigid fused $\pi$ -spacer in D- $\pi$ -A type molecule for dye-sensitized solar cell: A computational investigation**

Ping Li, Zhixiang Wang, Chongping Song and Houyu Zhang\*

*State Key Laboratory of Supramolecular Structure and Materials,  
Institute of Theoretical Chemistry, Jilin University, Changchun  
130012, P. R. China*

\*E-mail: [houyuzhang@jlu.edu.cn](mailto:houyuzhang@jlu.edu.cn)

---

## Contents

**Fig. S1** Optimized structures of the rest of dyes and their dye-TiO<sub>2</sub> complexes.

**Fig. S2** Spatial distributions of the frontier molecular orbitals for dyes **5-8**.

**Fig. S3** Contribution of the vibrational modes to the reorganization energy for dyes **1-3**.

**Fig. S4** Frontier molecular orbitals of dye-TiO<sub>2</sub> complexes for dyes **1-3**.

**Fig. S5** DOS of TiO<sub>2</sub> and PDOS of TiO<sub>2</sub> in dye-TiO<sub>2</sub> complexes.

**Table S1** Calculated HOMO energy levels of dyes **1, 2** and **3** with different functionals in tetrahydrofuran (THF) solution.

**Table S2** Calculated first singlet excitation energies ( $E_{\lambda_{\max}}$ ) and the maximum absorption wavelengths ( $\lambda_{\max}$ ) of dyes **1, 2** and **3** with different functionals in THF solution.

**Table S3** Selected bond lengths (Å) and adsorption energies of all investigated dye-TiO<sub>2</sub> complexes.

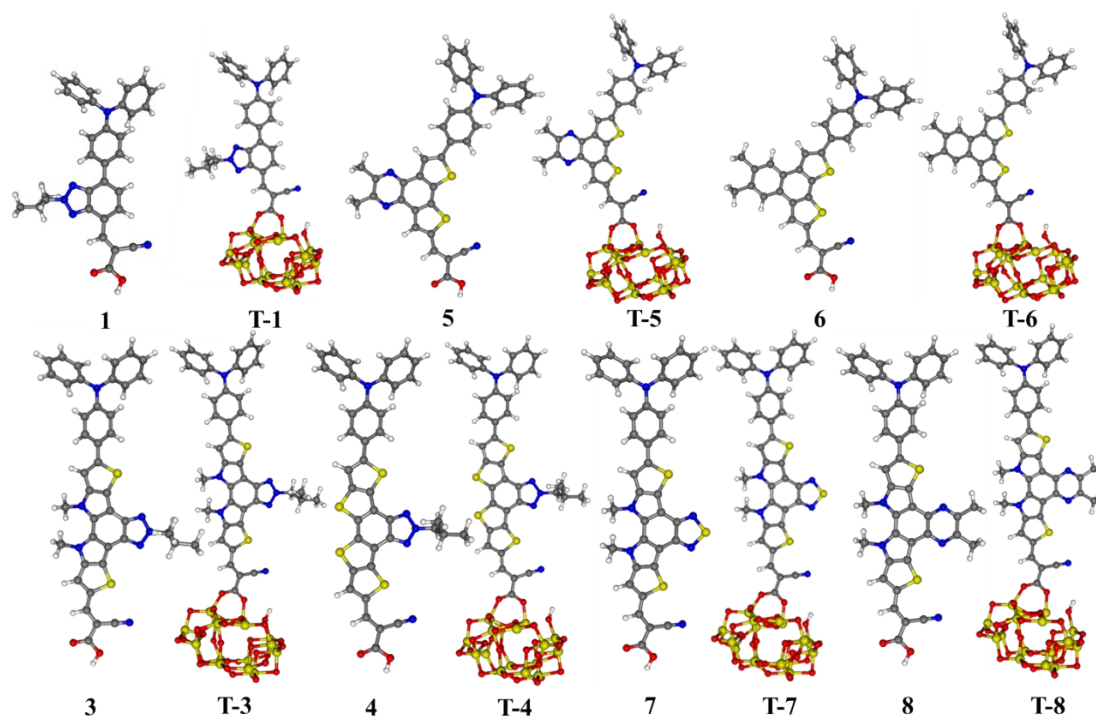

**Fig. S1** Optimized structures of the rest of dyes and their dye-TiO<sub>2</sub> complexes.

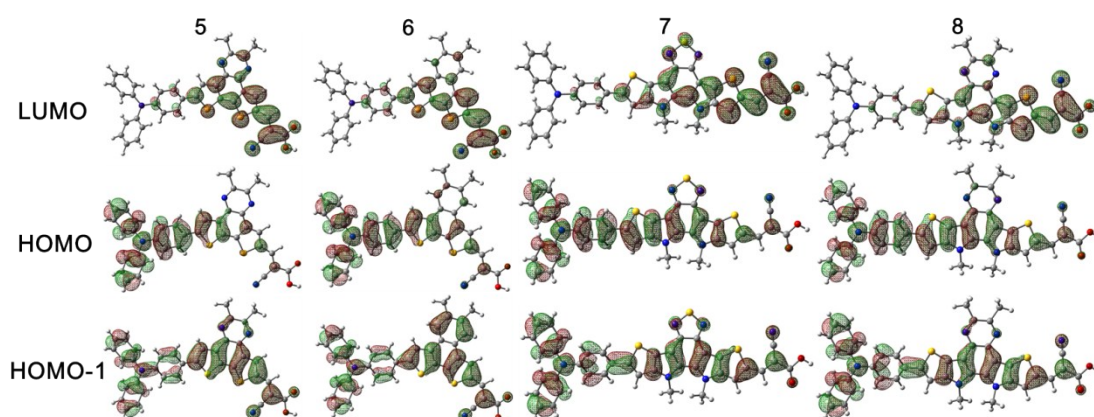

**Fig. S2** Spatial distributions of the frontier molecular orbitals for dyes 5-8.

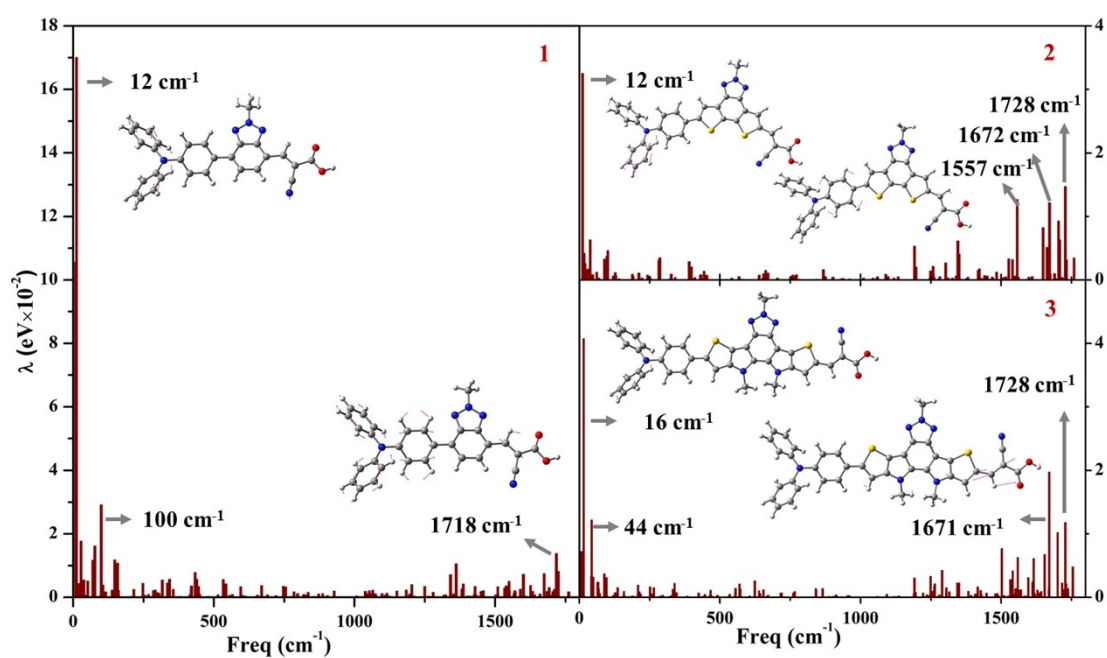

**Fig. S3** Contribution of the vibrational modes to the reorganization energy for dyes **1-3**, embedded with the normal modes contribute the most for  $\Lambda$ .

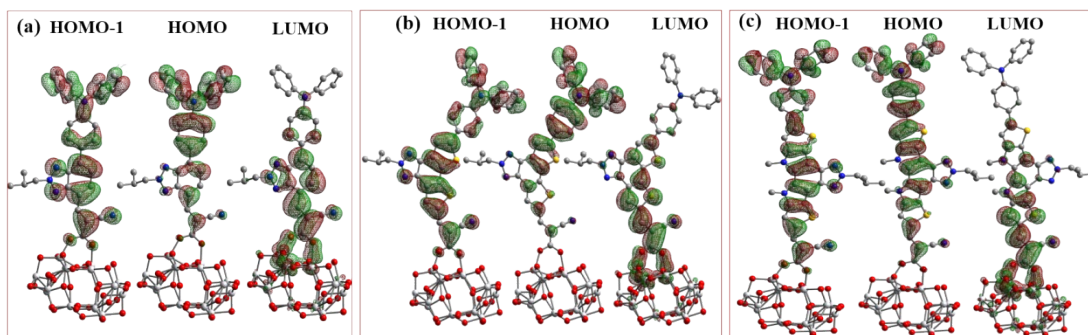

**Fig. S4** Frontier molecular orbitals of dye-TiO<sub>2</sub> complexes for **1** (a), **2** (b), and **3** (c) (saturated H atoms are not shown).

The details in calculation of  $\Delta E_{CB}$ : As indicated in Fig. S5, the comparison of the PDOS of TiO<sub>2</sub> in 1-TiO<sub>2</sub> complex and the DOS of pure TiO<sub>2</sub> are made to determine the  $\Delta E_{CB}$ . The linear fittings of DOS profiles at the low energy range for the conduction band are performed. The intercepts of fitted lines with the energy axis are considered as the CB edge, and  $\Delta E_{CB}$  can be approximately evaluated by the difference of intercept at energy axis for two fitted lines.

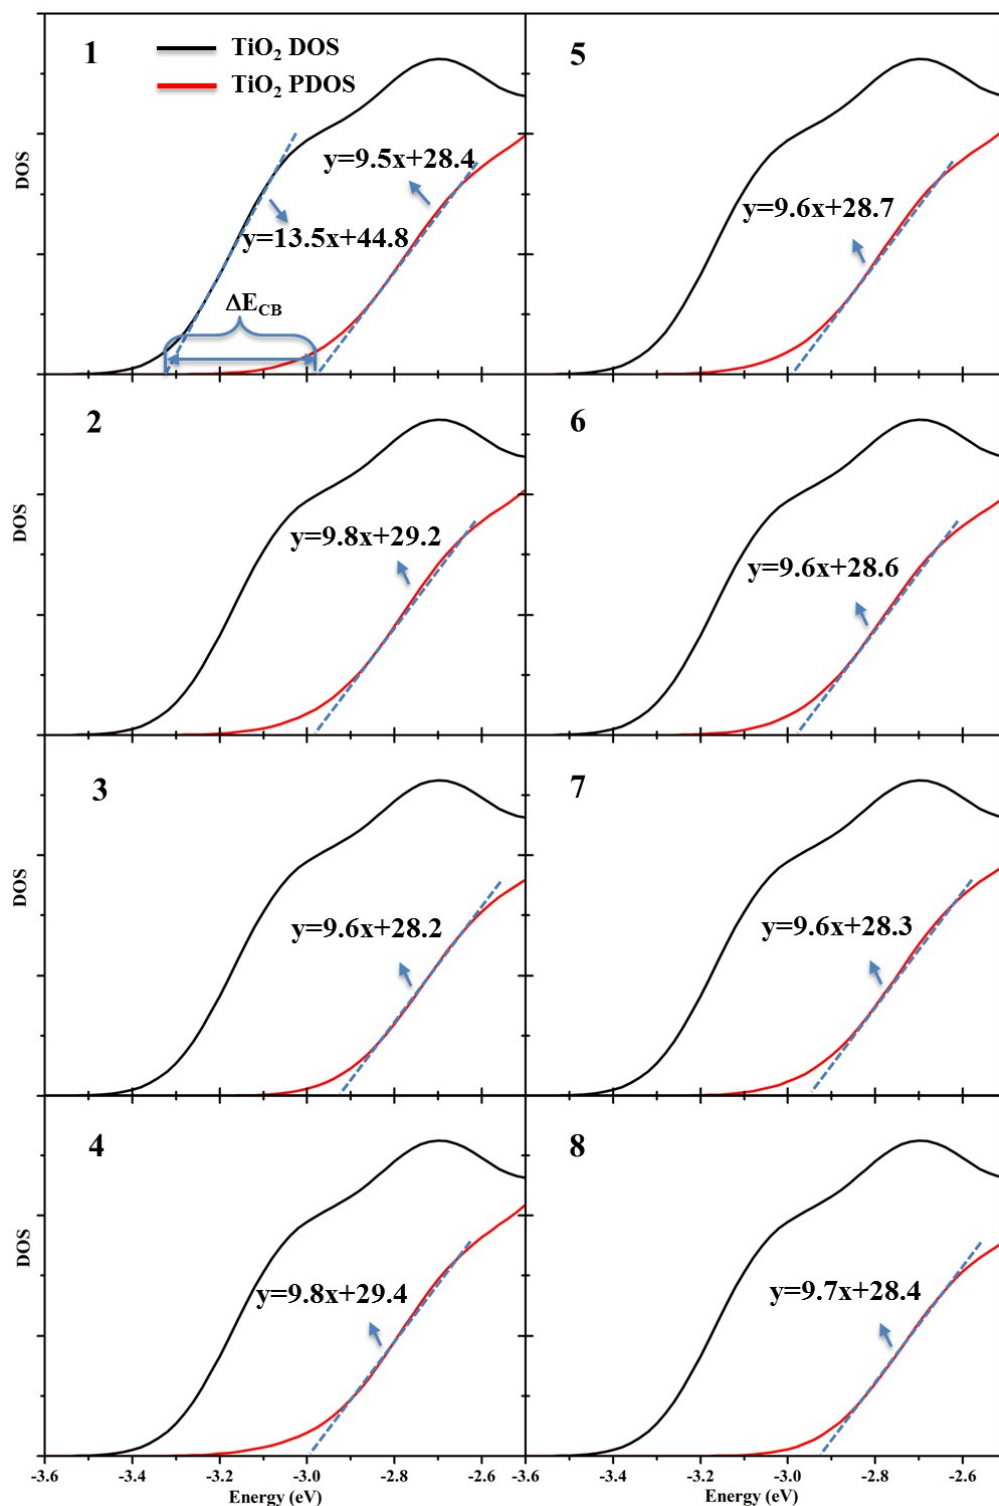

**Fig. S5** DOS of TiO<sub>2</sub> and PDOS of TiO<sub>2</sub> in dye-TiO<sub>2</sub> complexes.

**Table S1** Calculated HOMO energy levels of dyes **1**, **2**, and **3** in THF with functionals of PBE0, PBE0-1/3, PBE38, and mpw1k, and corresponding experimental values.

|          | PBE0<br>(25% HF <sub>exc</sub> ) | PBE0-1/3<br>(33.3% HF <sub>exc</sub> ) | PBE38<br>(37.5% HF <sub>exc</sub> ) | MPW1K<br>(42.8% HF <sub>exc</sub> ) | Expt. |
|----------|----------------------------------|----------------------------------------|-------------------------------------|-------------------------------------|-------|
| <b>1</b> | -5.40                            | -5.70                                  | -5.85                               | -6.06                               | -5.80 |
| <b>2</b> | -5.34                            | -5.63                                  | -5.78                               | -6.00                               | -5.76 |
| <b>3</b> | -5.10                            | -5.38                                  | -5.52                               | -5.73                               | -5.48 |

**Table S2** Calculated first singlet excitation energies ( $E_{\lambda_{\max}}$ ) and the maximum absorption wavelengths ( $\lambda_{\max}$ ) of dyes **1**, **2**, and **3** with functionals of PBE0, mpw1k, BHandHLYP, and CAM-B3LYP, and corresponding experimental values. The values denote the percentage of nonlocal Hartree-Fock exchange (HF<sub>exc</sub>) in parentheses.

|          |                          | PBE0<br>(25%) | mpw1k<br>(42.8%) | BHandHLYP<br>(50%) | CAM-B3LYP<br>(19% at SR and 65% at LR) | Expt. |
|----------|--------------------------|---------------|------------------|--------------------|----------------------------------------|-------|
| <b>1</b> | $E_{\lambda_{\max}}$ /eV | 2.25          | 2.69             | 2.84               | 2.85                                   | 2.89  |
|          | $\lambda_{\max}$ /nm     | 552           | 461              | 437                | 435                                    | 430   |
| <b>2</b> | $E_{\lambda_{\max}}$ /eV | 2.22          | 2.68             | 2.81               | 2.85                                   | 2.86  |
|          | $\lambda_{\max}$ /nm     | 559           | 462              | 442                | 435                                    | 434   |
| <b>3</b> | $E_{\lambda_{\max}}$ /eV | 2.25          | 2.58             | 2.65               | 2.69                                   | 2.58  |
|          | $\lambda_{\max}$ /nm     | 552           | 481              | 468                | 461                                    | 480   |

**Table S3** Selected bond lengths (Å) and adsorption energies of all investigated dye-TiO<sub>2</sub> complexes.

|          | Ti-O (H) (Å) | Ti-O (Å) | E <sub>ads</sub> (kcal mol <sup>-1</sup> ) |
|----------|--------------|----------|--------------------------------------------|
| <b>1</b> | 1.95         | 2.01     | -31.64                                     |
| <b>2</b> | 1.95         | 2.02     | -26.09                                     |
| <b>3</b> | 1.95         | 2.00     | -20.78                                     |
| <b>4</b> | 1.95         | 2.01     | -21.58                                     |
| <b>5</b> | 1.95         | 2.02     | -26.88                                     |
| <b>6</b> | 1.95         | 2.02     | -27.12                                     |
| <b>7</b> | 1.95         | 2.01     | -20.60                                     |
| <b>8</b> | 1.95         | 2.00     | -21.51                                     |
